# Supplementary material
Source: Springer Nature journal article supplement (https://www.springermedizin.de/resource/supplementary/12906_2003_38_MOESM2_ESM.pdf/9523904)

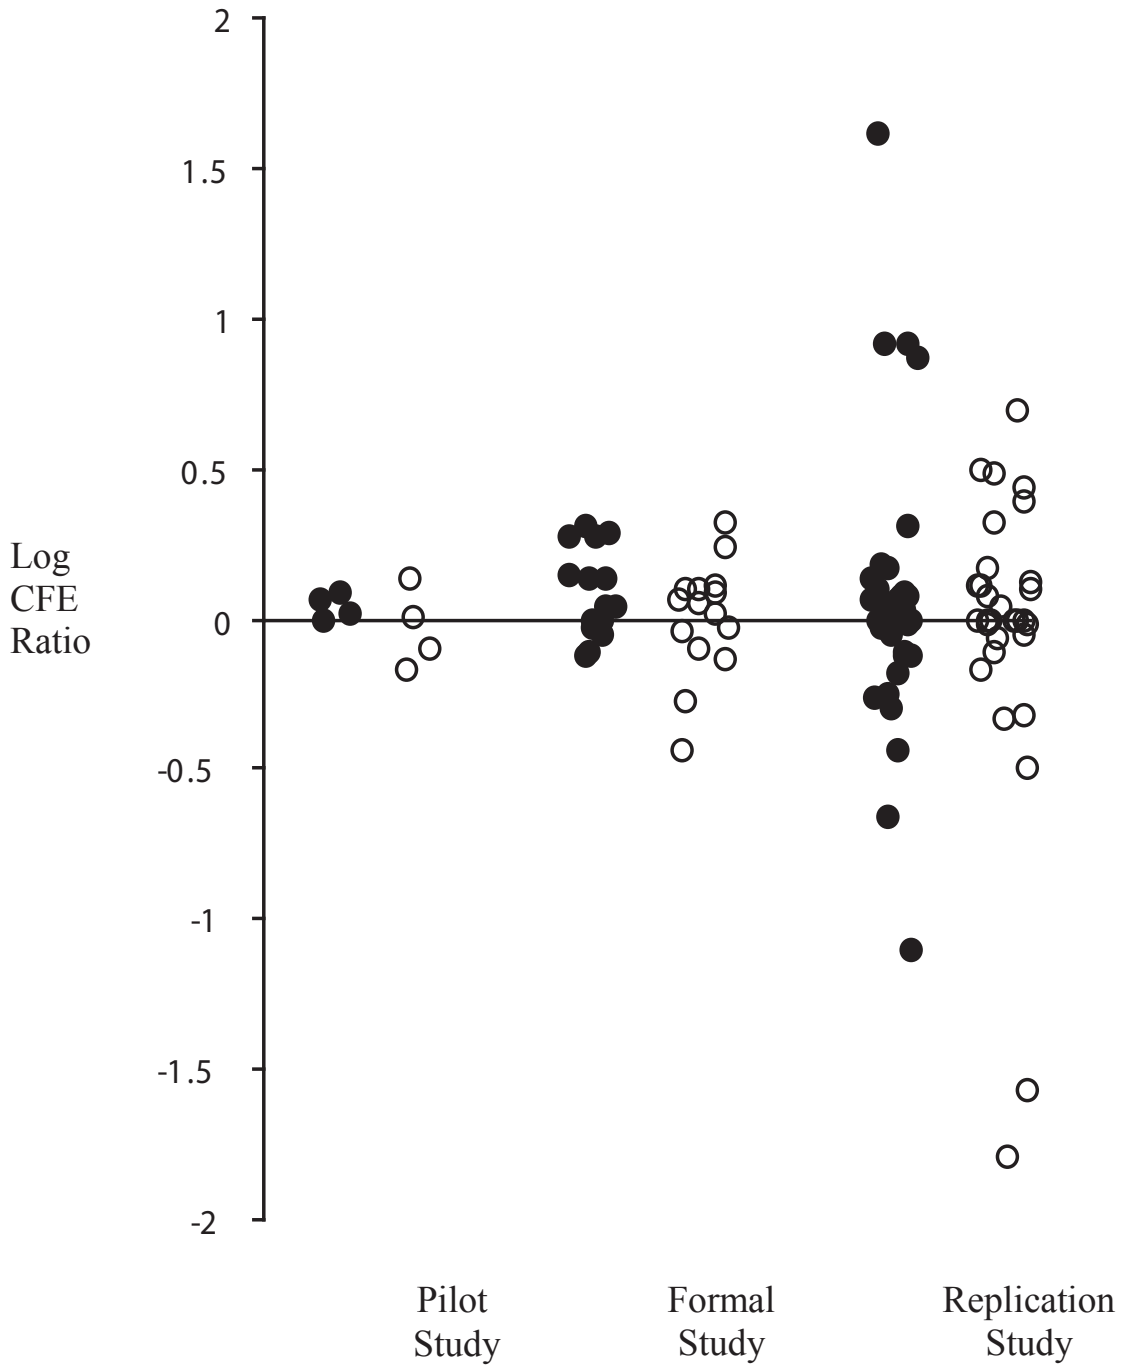

Supplement: MOESM2 [file 9523904]
